# Supplementary material
Source: PubMed Central journal article supplement (PMC305313)
Supplement: cmaj_170_1_47_v2_1.pdf [file cmaj_170_1_47_v2_1.pdf]

**e-Appendix 1: Primers used for reverse-transcriptase polymerase chain reaction (RT-PCR) for the detection of severe acute respiratory syndrome coronavirus (SARS-CoV)**

| Laboratory                                                     | Primers pairs                                                                                                                                                         | Gene target  | Reference                                                                                           |
|----------------------------------------------------------------|-----------------------------------------------------------------------------------------------------------------------------------------------------------------------|--------------|-----------------------------------------------------------------------------------------------------|
| National Microbiology Laboratory                               | RT-PCR primers<br>5'-CAGAGCCATGCCTAACATG-3'<br>5'-AATGTTTACGCAGGTAAGCG-3'<br>Nested PCR primers<br>5'-TGTTAAACCAGGTGGAAC-3'<br>5'-CCTGTGTTGTAGATTGCG-3'               | Polymerase   | Health Canada (Poutanen et al <sup>5</sup> )                                                        |
| Central Public Health Laboratory                               | As above                                                                                                                                                              | As above     | As above                                                                                            |
| Sunnybrook and Women's College Health Sciences Centre, Toronto | RT-PCR primers<br>5'-ATGAATTACCAAGTCAATGGTTAC-3'<br>5'-CATAACCAGTCGGTACAGCTAC-3'<br>Nested PCR primers<br>5'-GAAGCTATTCGTCACGTTTCG-3'<br>5'-CTGTAGAAAATCCTAGCTGGAG-3' | Polymerase   | RealArt™ HPA-Coronavirus LC RT PCR Kit (artus GmbH, Hamburg, Germany) (Drosten et al <sup>3</sup> ) |
| Hospital for Sick Children (HSC), Toronto                      | RT primer<br>5'-GCATAGGCAGTAGTTGCATC-3'<br>PCR primers<br>5'-TGATGGGATGGGACTATCCTAAGTGTGA-3'<br>5'-TTGCATCACCAGTGTGCCACCAGGTT-3'                                      | Polymerase   | HSC (Poutanen et al <sup>5</sup> )                                                                  |
| HSC, Toronto                                                   | 5'-TGATGGGTTGGGACTATCCTAAATGTGA-3'<br>5'-GTAGTTGCATCACCAGGAGTTGTGCCACC-3'                                                                                             | Polymerase   | HSC (R. Tellier et al: unpublished data)                                                            |
| Saint Joseph's Hospital (SJH), Hamilton                        | 5'-TGAATACACCCAAAGACCAC-3'<br>5'-TGATGAGGAGCGAGAAGAG-3'                                                                                                               | Nucleocapsid | SJH (J. Mahony et al: unpublished data)                                                             |
